# Supplementary material for: Food-derived cyanidin-3-O-glucoside alleviates oxidative stress: evidence from the islet cell line and diabetic db/db mice
Source: Royal Society of Chemistry journal article supplement (doi:10.1039/d1fo02385c), 2021-01-01
Supplement: d1fo02385c4.pdf [file d1fo02385c4.pdf]

### Supplementary figure caption

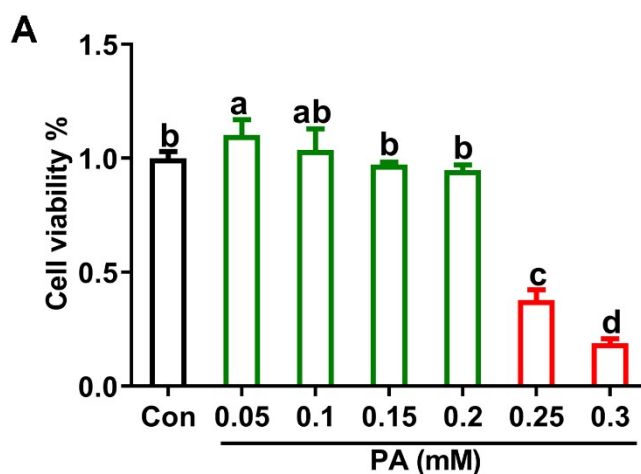

**Figure. S1** The safe concentration of PA on NIT-1 cells. NIT-1 cells were cultured with 1640 medium contained different concentrations of PA and high glucose (30 mM) for 24 h. (A) Viability of NIT-1 cells analyzed by MTT assay.

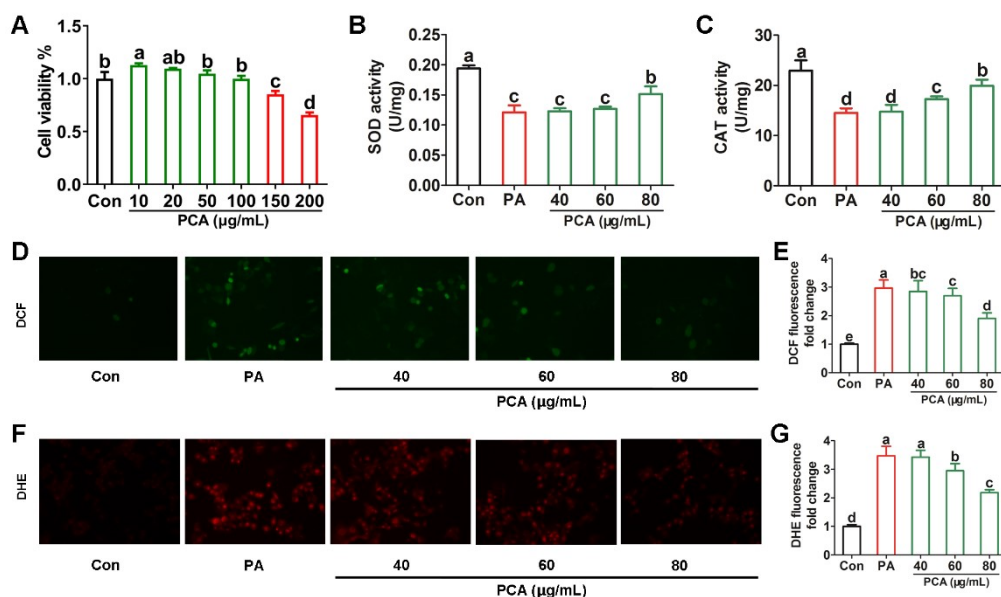

**Figure. S2** The antioxidant capacity of PCA *in vitro*. NIT-1 cells were cultured with 1640 medium contained normal glucose (5 mM) only or high glucose (30 mM) and PA (0.2 mM) and exposure to PCA for 24 h. (A) Viability of NIT-1 cells analyzed by MTT

assay. (B) The enzyme activity of SOD. (C) The enzyme activity of CAT. (D) NIT-1 cells were incubated with DCF probe for ROS analysis. (E) Quantitative analysis of fluorescence intensity for ROS. (F) NIT-1 cells were incubated with DHE probe for  $O_2^-$  analysis. (G) Quantitative analysis of fluorescence intensity for  $O_2^-$ . Histograms with different letters above are significantly different,  $p < 0.05$ , one-way ANOVA test.

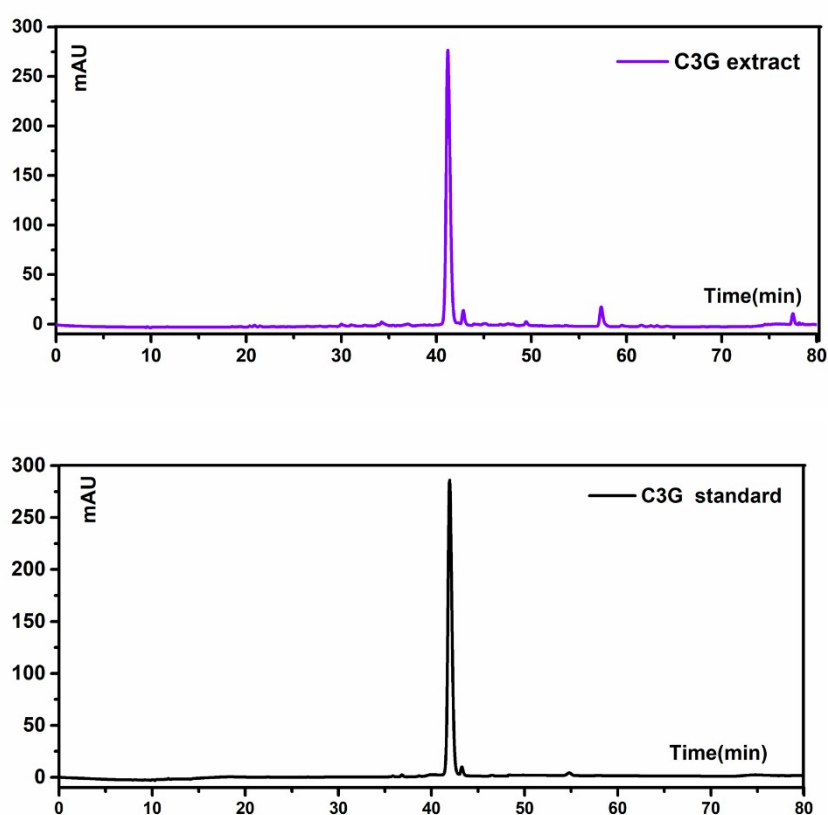

**Figure. S3 Ingredients of anthocyanins extract.** (A) Ingredients of C3G extracts were analyzed by HPLC. (B) Ingredients of C3G standard were analyzed by HPLC.
