# Supplementary material for: Food-derived cyanidin-3-O-glucoside alleviates oxidative stress: evidence from the islet cell line and diabetic db/db mice
Source: Royal Society of Chemistry journal article supplement (doi:10.1039/d1fo02385c), 2021-01-01
Supplement: d1fo02385c5.pdf [file d1fo02385c5.pdf]

**Table-S1.** Free radical scavenging rate of C3G and Vitamin C

| <b>Name</b> | <b>C3G</b>                                           | <b>Vitamin C</b>            |
|-------------|------------------------------------------------------|-----------------------------|
| DPPH        | IC <sub>50</sub> =286 µg/mL                          | IC <sub>50</sub> =129 µg/mL |
| ABTS        | IC <sub>50</sub> =370 µg/mL                          | IC <sub>50</sub> =383 µg/mL |
| FRAP        | 0.96 times of the same<br>concentration of Vitamin C |                             |

**Table-S2.** Free radical scavenging rate of PCA and Vitamin C

| <b>Name</b> | <b>PCA</b>                                           | <b>Vitamin C</b>            |
|-------------|------------------------------------------------------|-----------------------------|
| DPPH        | IC <sub>50</sub> =346 µg/mL                          | IC <sub>50</sub> =142 µg/mL |
| ABTS        | IC <sub>50</sub> =463 µg/mL                          | IC <sub>50</sub> =398 µg/mL |
| FRAP        | 0.81 times of the same<br>concentration of Vitamin C |                             |
