# Supplementary figures and images for: Food-derived cyanidin-3-O-glucoside alleviates oxidative stress: evidence from the islet cell line and diabetic db/db mice
Source: Royal Society of Chemistry journal article supplement (doi:10.1039/d1fo02385c), 2021-01-01

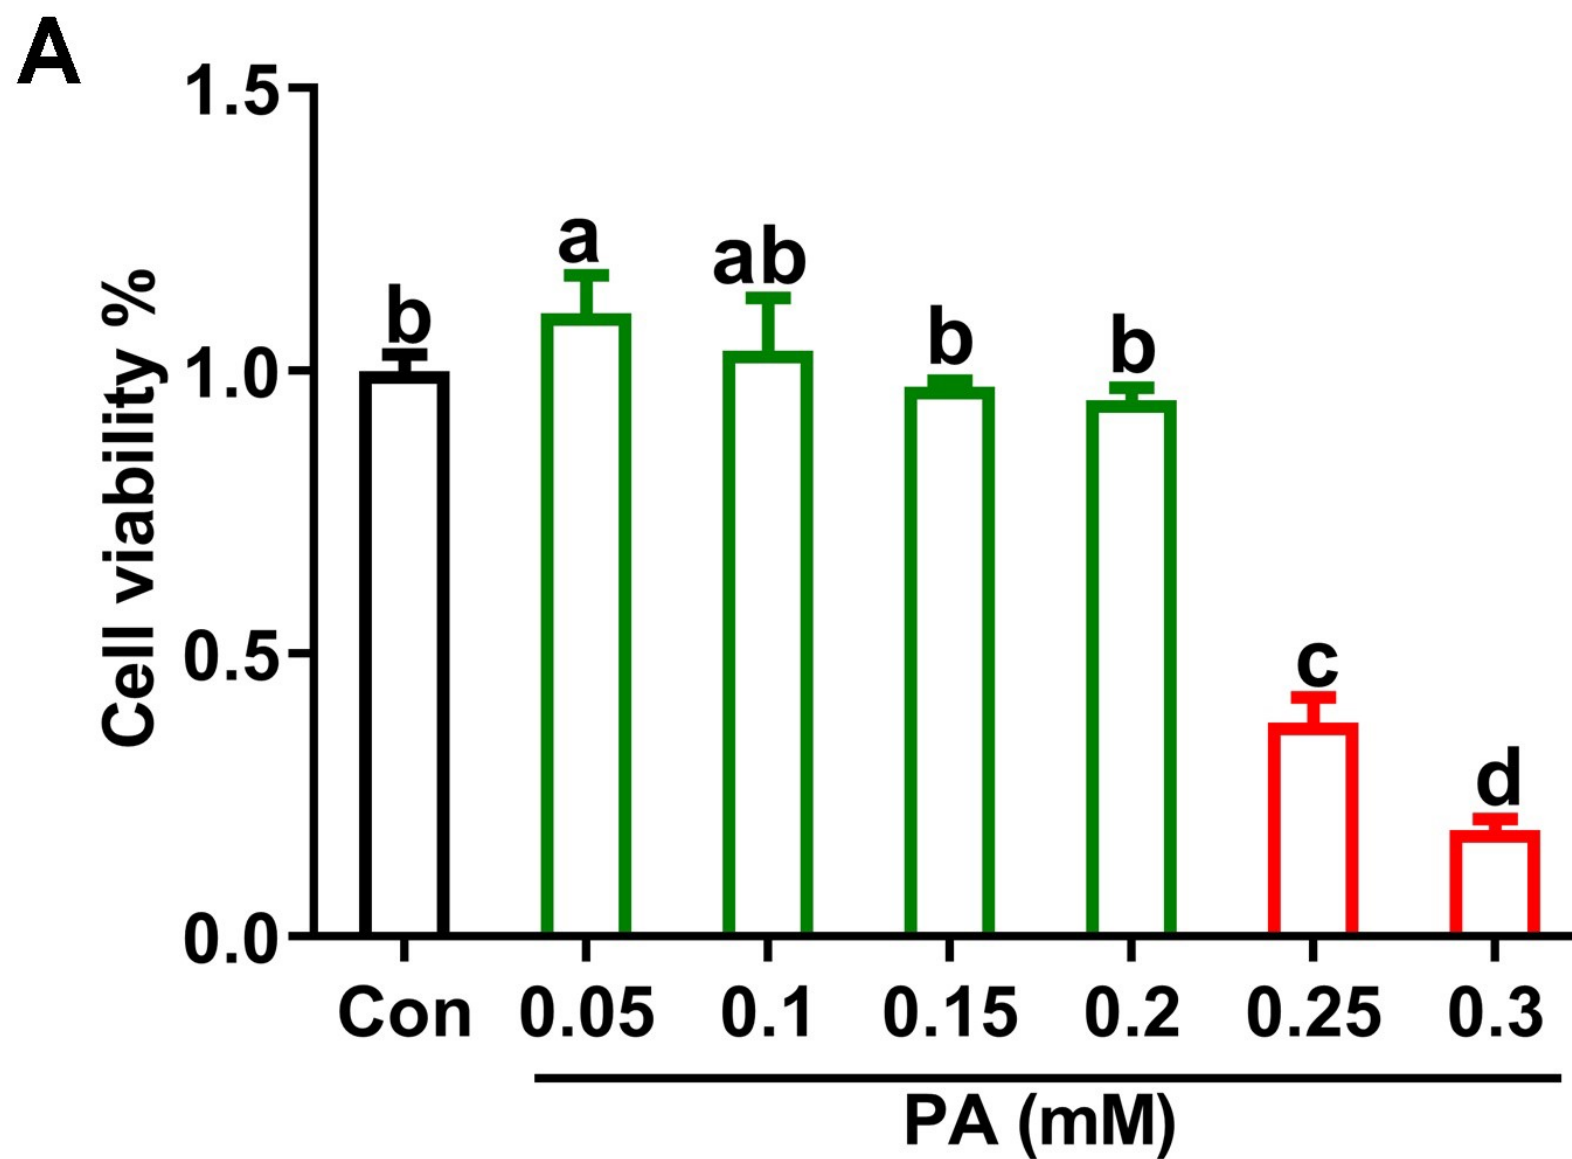

Supplement: d1fo02385c1.pdf [file d1fo02385c1.pdf]

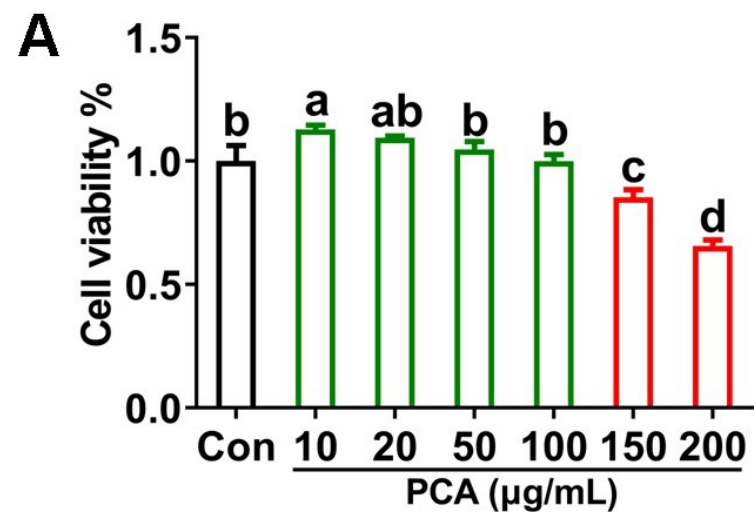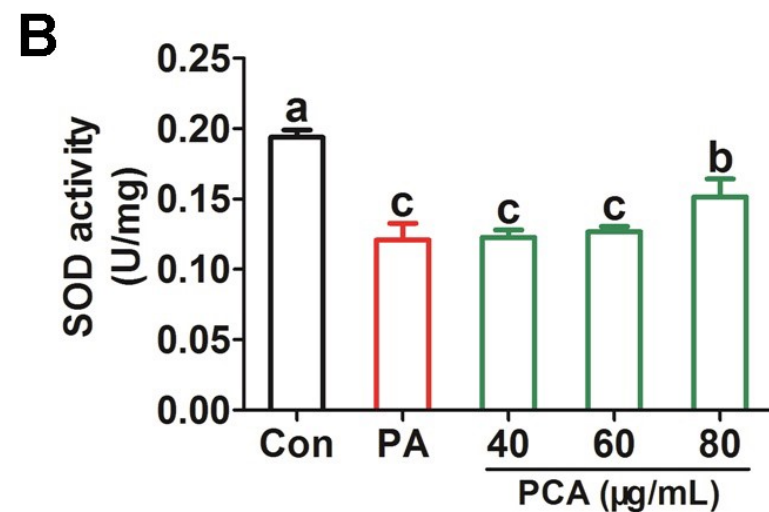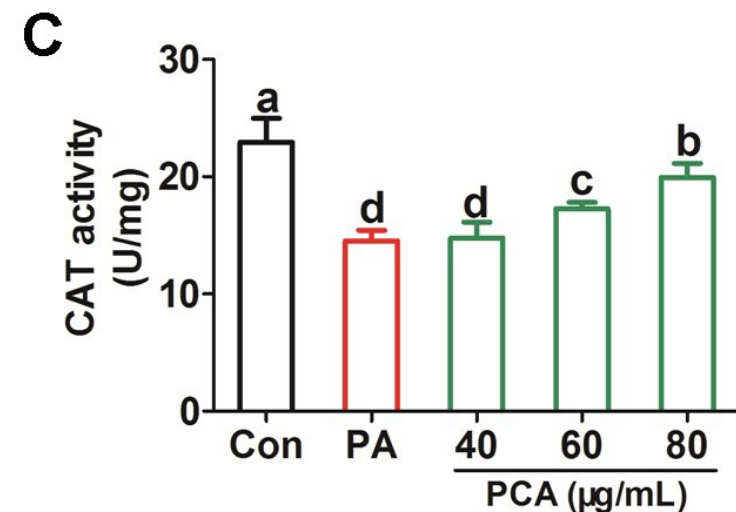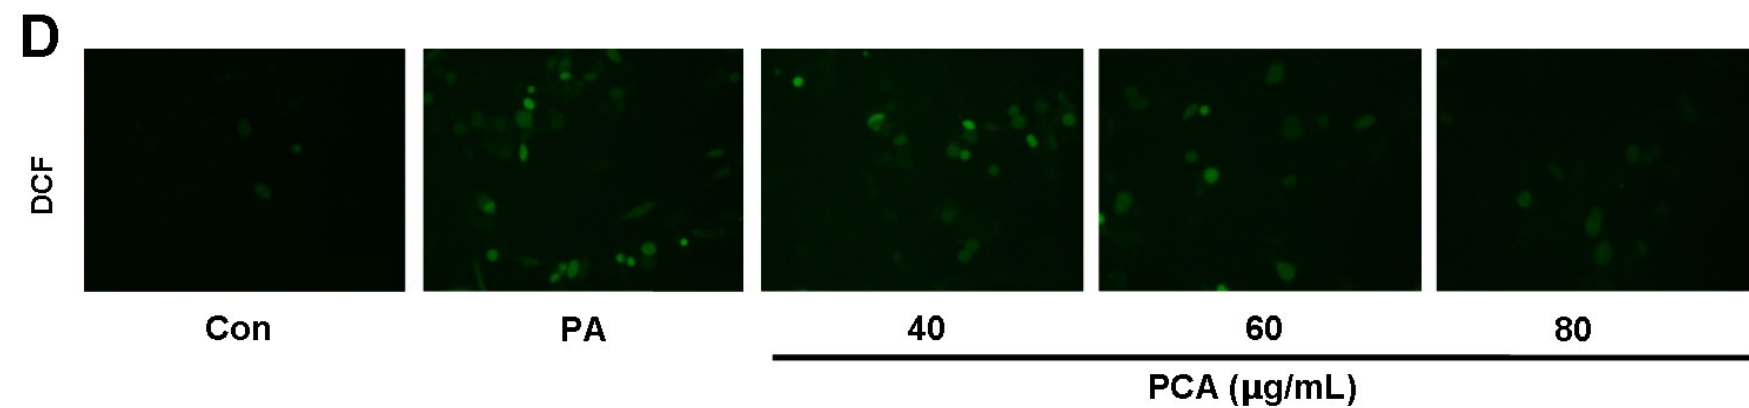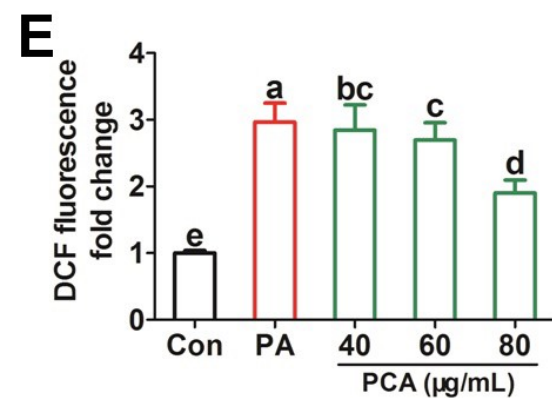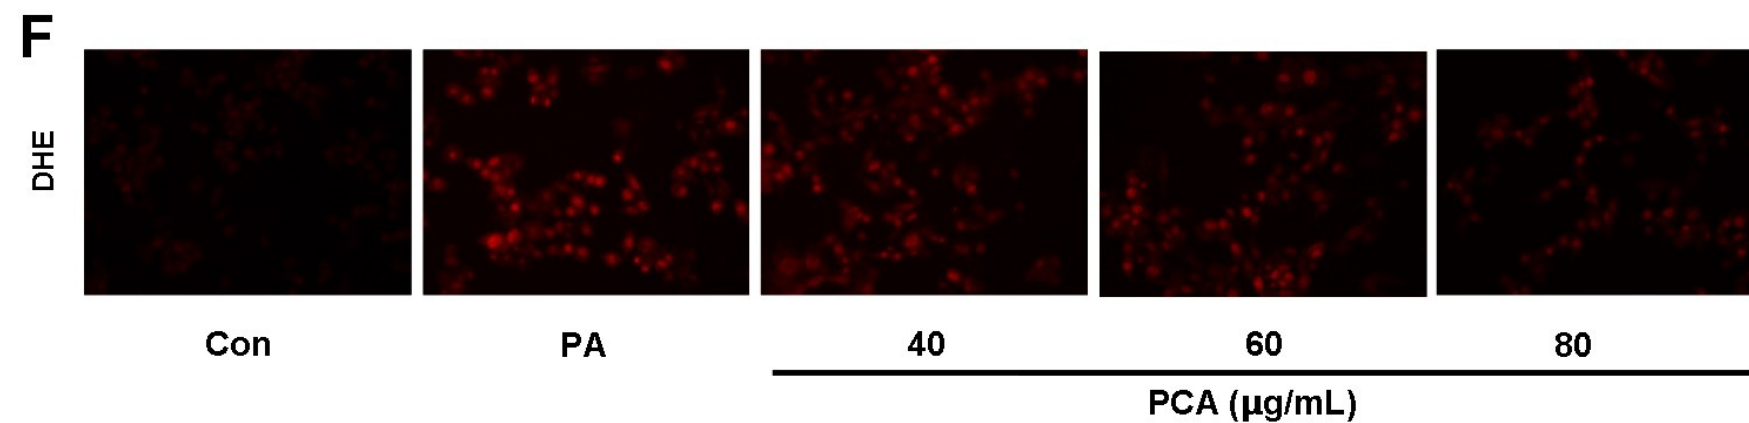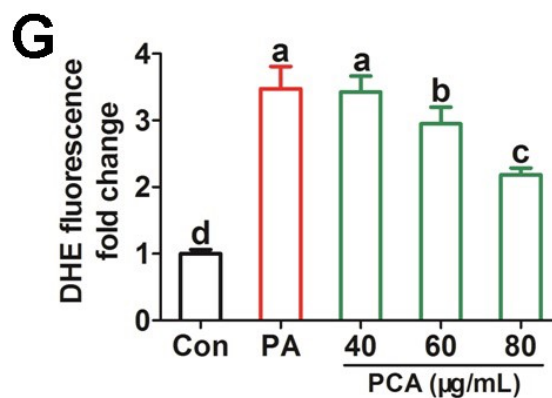

Supplement: d1fo02385c2.pdf [file d1fo02385c2.pdf]

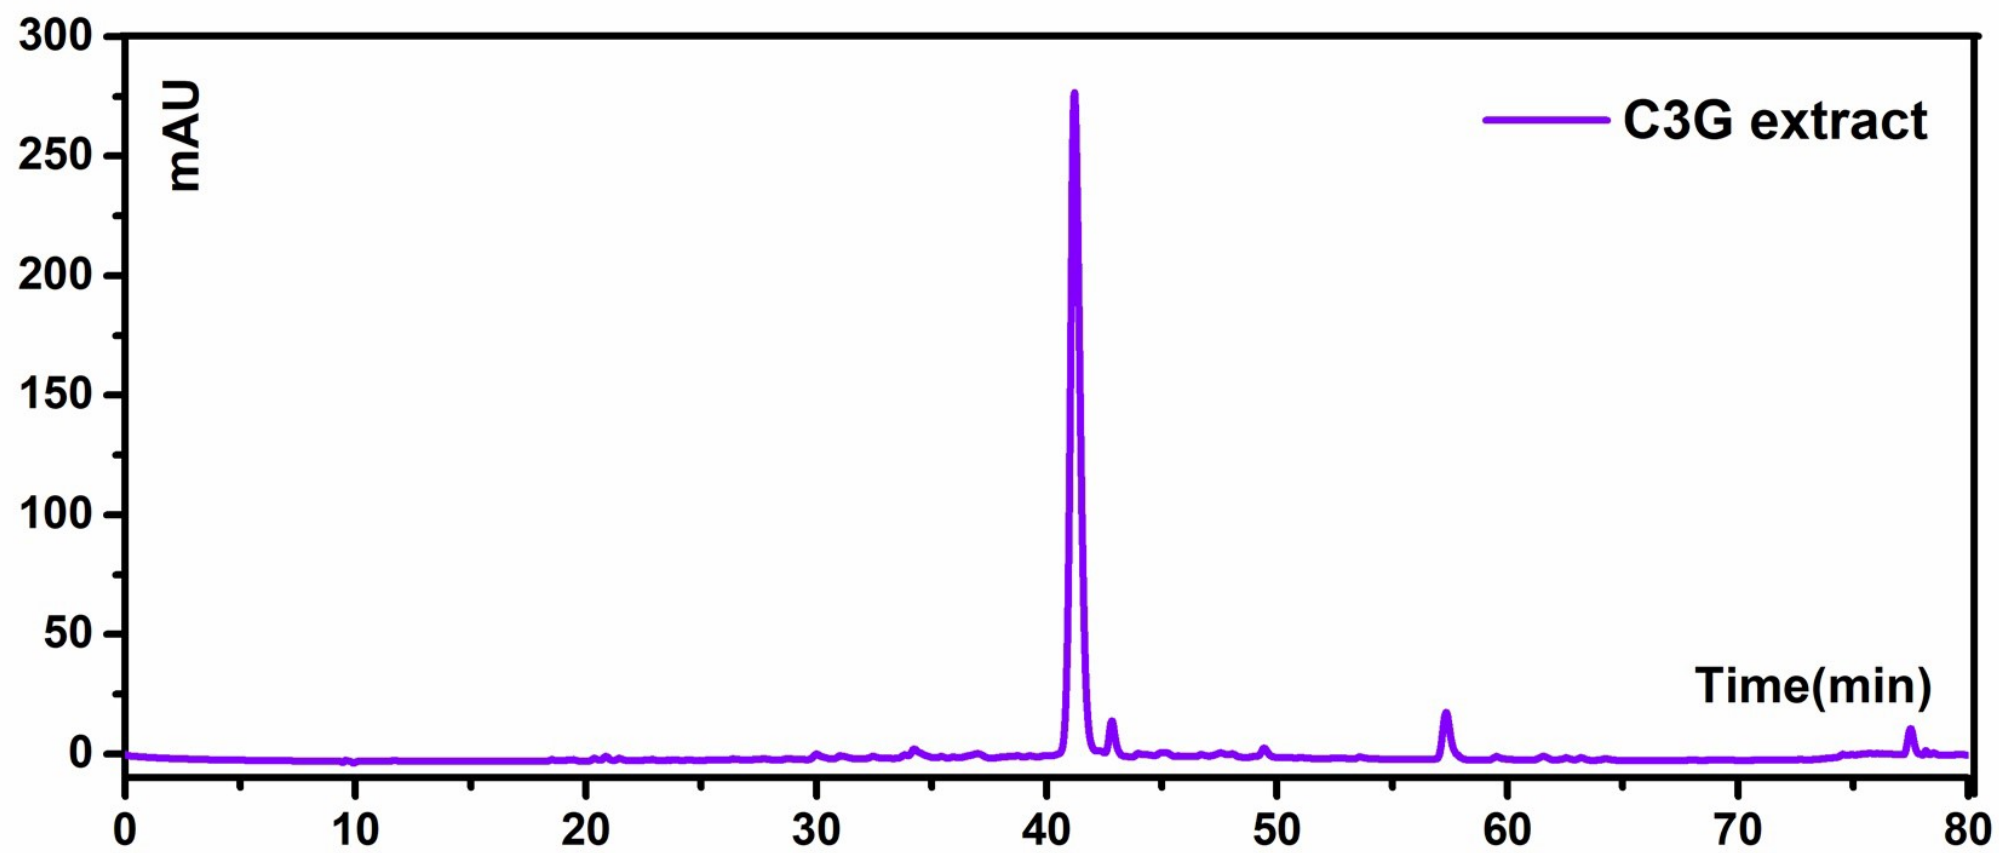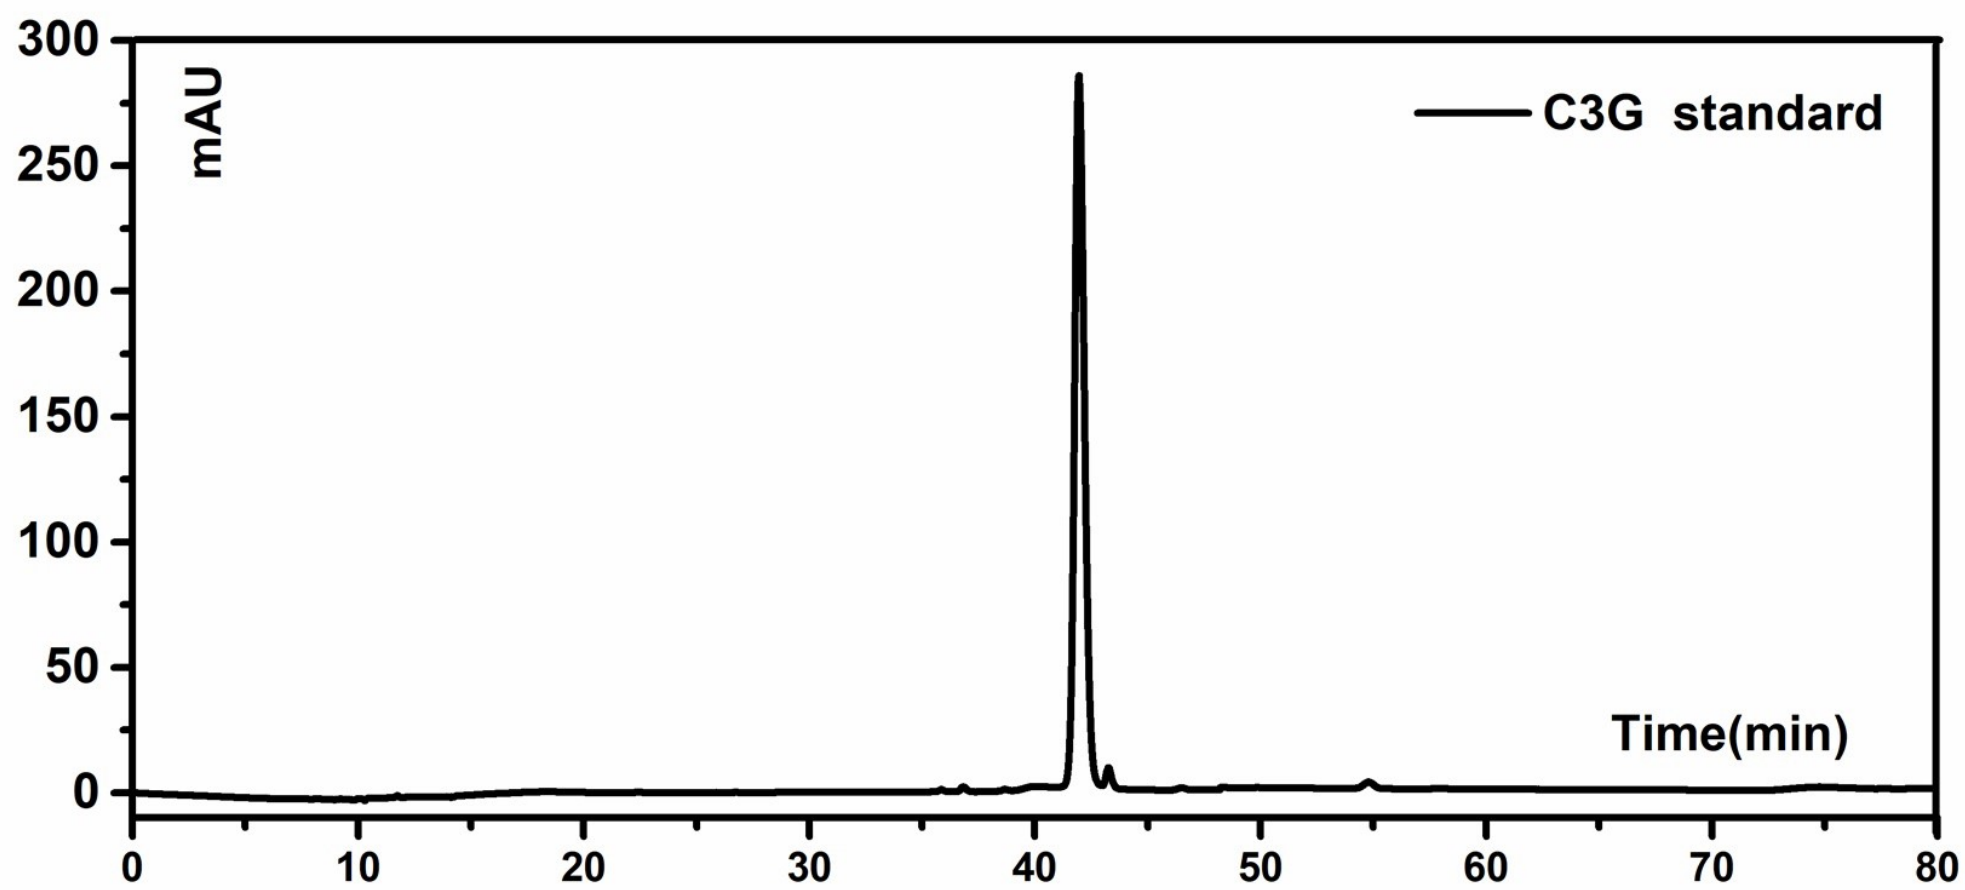

Supplement: d1fo02385c3.pdf [file d1fo02385c3.pdf]
